# Supplementary material for: Effects of a Single Session of OnabotulinumtoxinA Therapy on Sleep Quality and Psychological Measures: Preliminary Findings in a Population of Chronic Migraineurs
Source: MDPI journal article supplement (doi:10.3390/toxins15090527), 2023-08-27
Supplement: s1 [file s1]

# Supplementary Materials: Effects of a single session of onabotulinumtoxinA therapy on sleep quality and psychological measures: preliminary findings in a population of chronic migraineurs

Angelo Torrente, Paolo Alonge, Laura Pilati, Andrea Gagliardo, Lavinia Vassallo, Vincenzo Di Stefano, Antonino Lupica, Irene Quartana, Giovanna Viticchi, Mauro Silvestrini, Marco Bartolini, Cecilia Camarda and Filippo Brighina

|        |              | MMDs   | MADs   | HIT-6  | MIDAS  | BDI-II | HADS-a | HADS-d | PSQI   |
|--------|--------------|--------|--------|--------|--------|--------|--------|--------|--------|
| MMDs   | rho          | 1,000  | ,422** | ,303** | ,507** | ,232   | ,114   | ,084   | ,443** |
|        | Significance | .      | ,000   | ,007   | ,000   | ,218   | ,549   | ,658   | ,000   |
| MADs   | rho          | ,422** | 1,000  | -,183  | ,143   | -,023  | ,029   | -,093  | ,213   |
|        | Significance | ,000   | .      | ,112   | ,207   | ,908   | ,883   | ,636   | ,059   |
| HIT-6  | rho          | ,303** | -,183  | 1,000  | ,416** | ,544** | ,495** | ,587** | ,178   |
|        | Significance | ,007   | ,112   | .      | ,000   | ,002   | ,005   | ,001   | ,117   |
| MIDAS  | rho          | ,507** | ,143   | ,416** | 1,000  | ,518** | ,486** | ,588** | ,540** |
|        | Significance | ,000   | ,207   | ,000   | .      | ,003   | ,006   | ,001   | ,000   |
| BDI-II | rho          | ,232   | -,023  | ,544** | ,518** | 1,000  | ,866** | ,804** | ,772** |
|        | Significance | ,218   | ,908   | ,002   | ,003   | .      | ,000   | ,000   | ,000   |
| HADS-a | rho          | ,114   | ,029   | ,495** | ,486** | ,866** | 1,000  | ,810** | ,723** |
|        | Significance | ,549   | ,883   | ,005   | ,006   | ,000   | .      | ,000   | ,000   |
| HADS-d | rho          | ,084   | -,093  | ,587** | ,588** | ,804** | ,810** | 1,000  | ,736** |
|        | Significance | ,658   | ,636   | ,001   | ,001   | ,000   | ,000   | .      | ,000   |
| PSQI   | rho          | ,443** | ,213   | ,178   | ,540** | ,772** | ,723** | ,736** | 1,000  |
|        | Significance | ,000   | ,059   | ,117   | ,000   | ,000   | ,000   | ,000   | .      |

**Figure S1.** Spearman correlation analysis of all the studied parameters. \*\* = correlation is significant if  $\leq 0.01$  (two tails). Abbreviations: BDI-II: Beck Depression Inventory, 2nd edition; HADS: Hospital Anxiety and Depression Scale; HADS-a: anxiety subscale; HADS-d: depression subscale; HIT-6: Headache Impact Test 6; MADs: monthly acute medication days; MIDAS: Migraine Disability Assessment; MMDs: monthly migraine days; PSQI: Pittsburgh Sleep Quality Index.
